# Supplementary material for: Utilizing mutual information for detecting rare and common variants associated with a categorical trait
Source: PeerJ journal article supplement (doi:10.7717/peerj.2139), 2016-06-16

ALCOHOLISM

Dopaminergic synapse

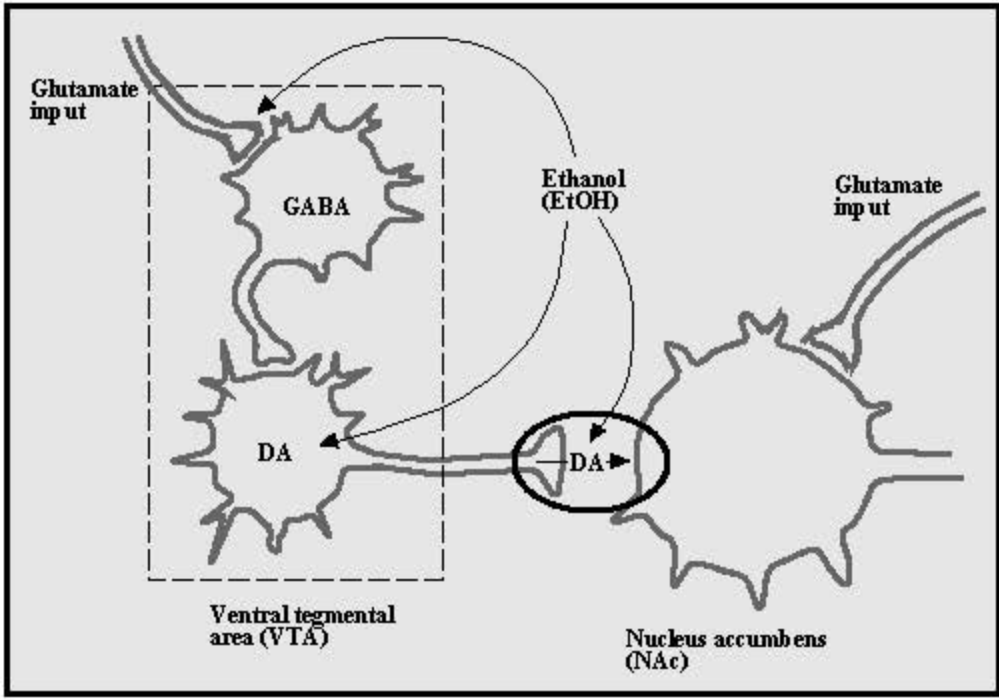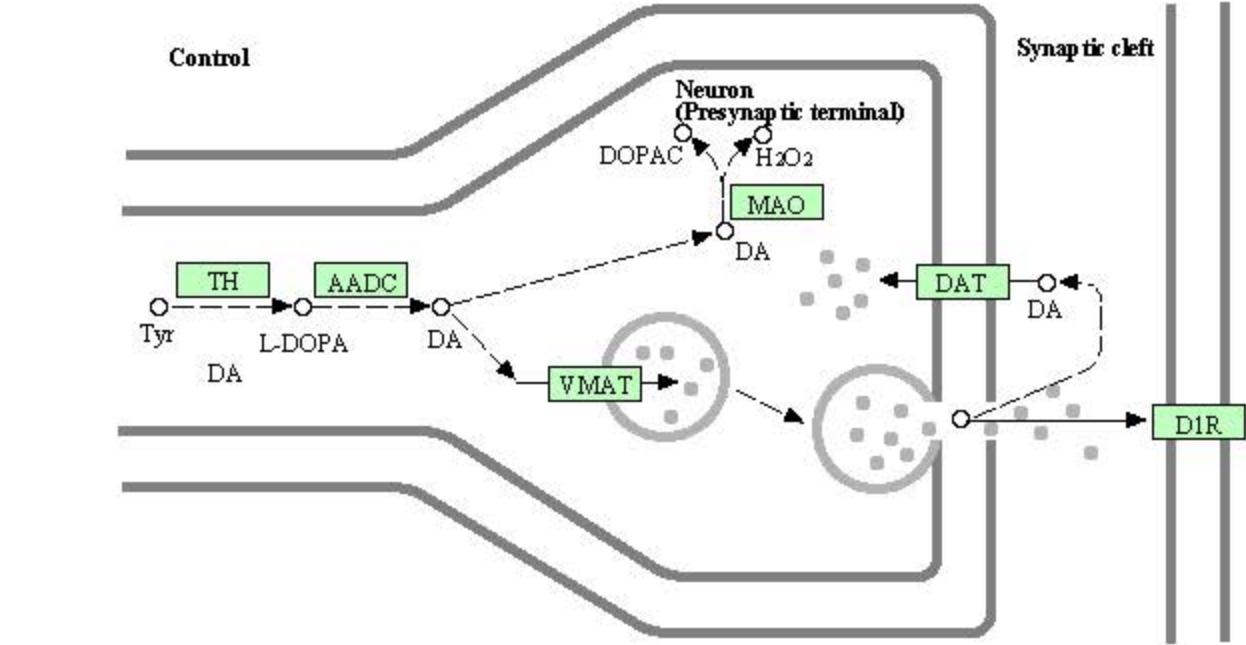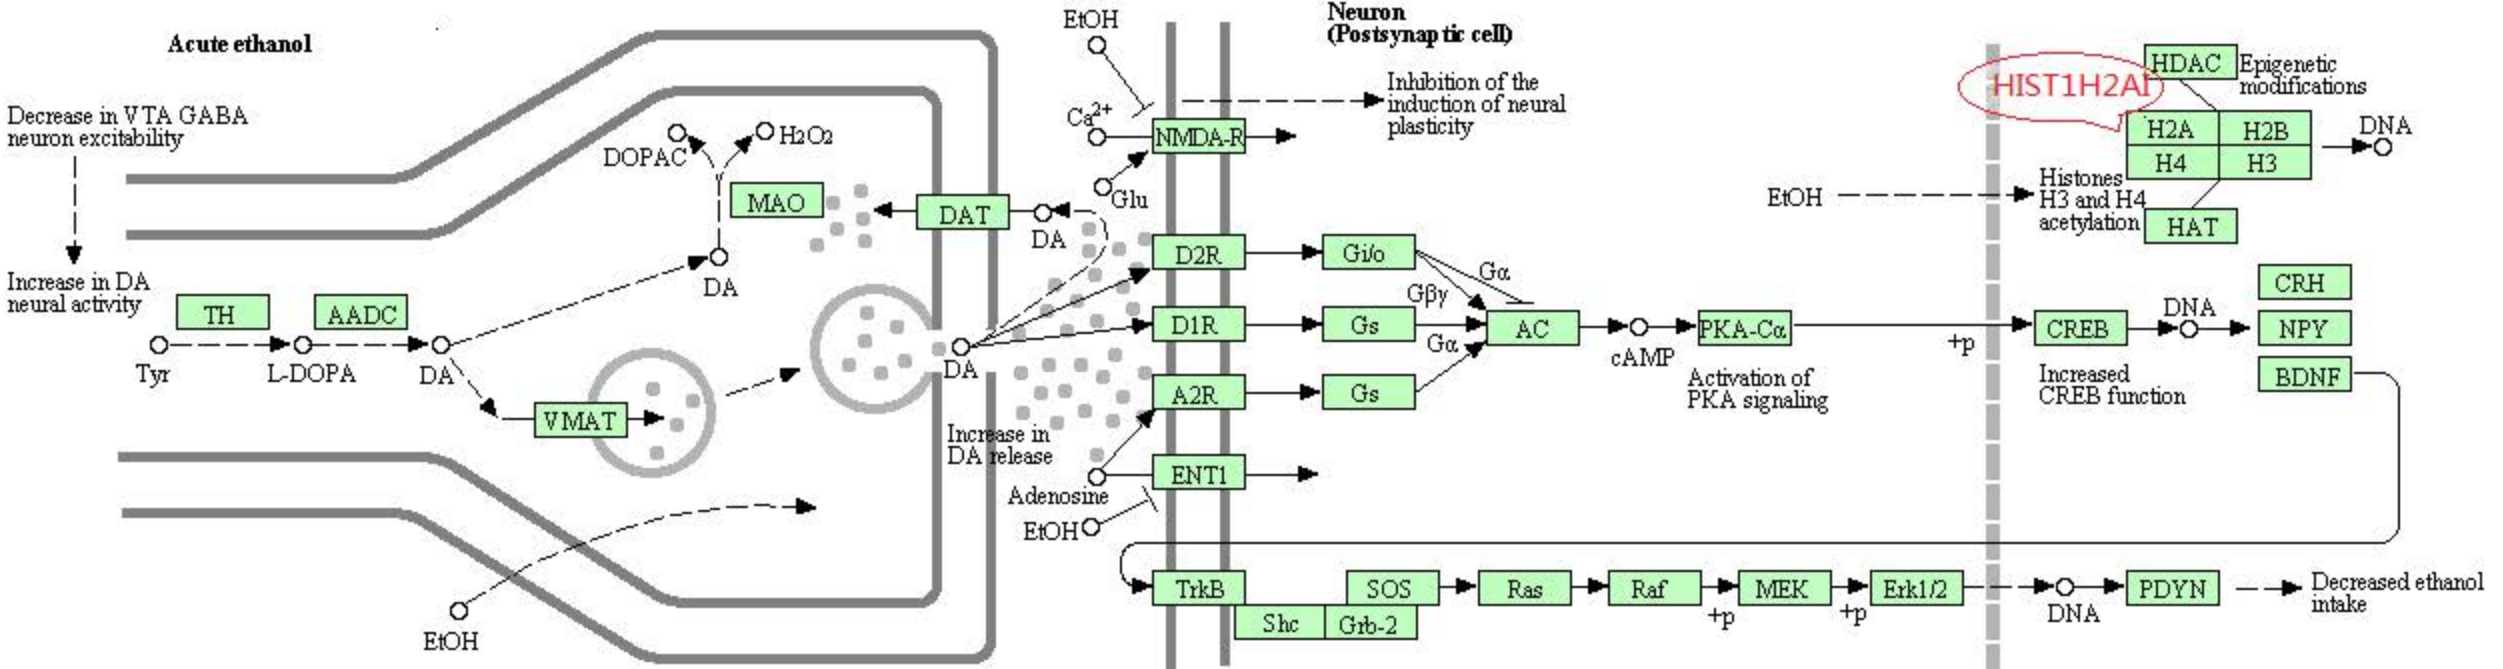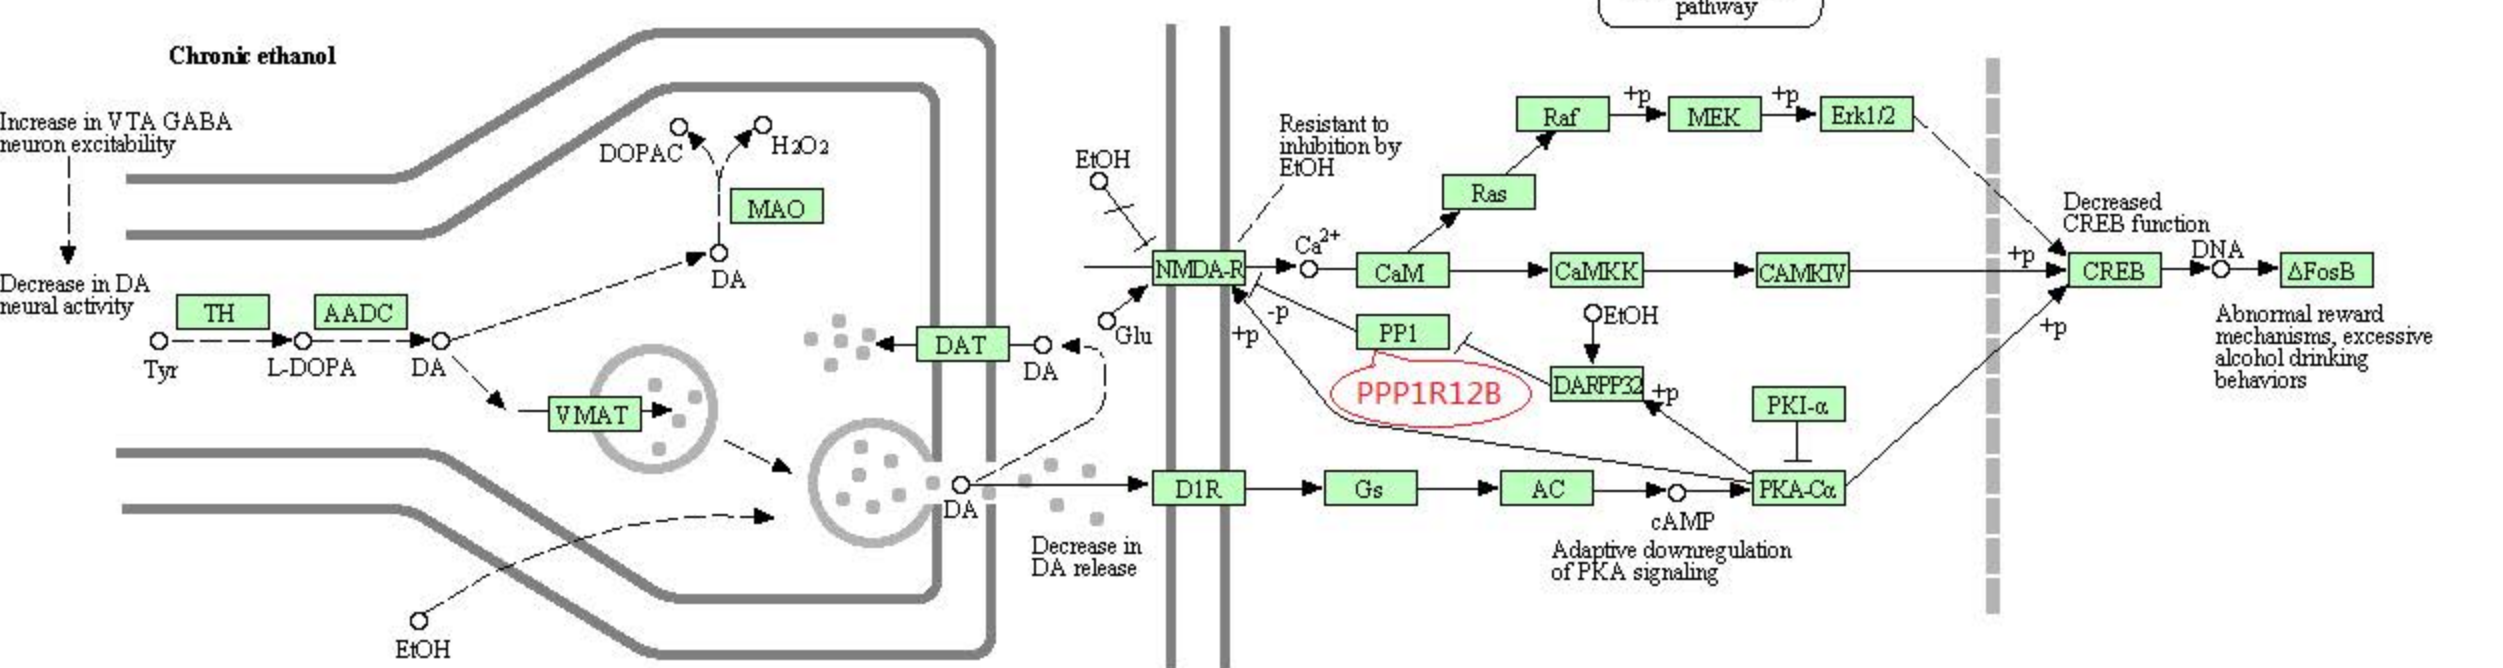

Supplement: Figure_S3.pdf [file Figure_S3.pdf]
